# Supplementary material
Source: PubMed Central journal article supplement (PMC1693835)
Supplement: pnas_0605645103_1.pdf [file pnas_0605645103_1.pdf]

| Relative pos. | -80                     | -70                    | -60                         | -50                       | -40                    | -30                    | -20                    | -10                    | +1                     | Frequency | TSS (relative pos.) |                |
|---------------|-------------------------|------------------------|-----------------------------|---------------------------|------------------------|------------------------|------------------------|------------------------|------------------------|-----------|---------------------|----------------|
| Genomic seq.  | TTGGTTTTTTATTCTTAACTTGT | TTTATTATTCTCTCTTGT     | TTTCTATTTACAAGAC            | CCCAATCAA                 | AAACAAATAAAACATCATCACA | ATG                    |                        |                        |                        |           |                     |                |
| #01           |                         | GATTCTTAACTTGT         | TTTATTATTCTCTCTTGT          | TTTCTATTTACAAGACACCAATCAA | AAACAAATAAAACATCATCACA | ATG                    |                        |                        |                        | 1         | accepted (-75)      |                |
| #02           |                         | TGGATTTATTATTCTCTCTTGT | TTTCTATTTACAAGACACCAATCAA   | AAACAAATAAAACATCATCACA    | ATG                    |                        |                        |                        |                        | 1         | rejected            |                |
| #03           |                         |                        | GATTATTCTCTCTTGT            | TTTCTATTTACAAGACACCAATCAA | AAACAAATAAAACATCATCACA | ATG                    |                        |                        |                        | 1         | accepted (-60)      |                |
| #04           |                         |                        | GATTCTCTCTTGT               | TTTCTATTTACAAGACACCAATCAA | AAACAAATAAAACATCATCACA | ATG                    |                        |                        |                        | 2         | accepted (-57)      |                |
| #05           |                         |                        | TTCTCTCTTGT                 | TTTCTATTTACAAGACACCAATCAA | AAACAAATAAAACATCATCACA | ATG                    |                        |                        |                        | 1         | rejected            |                |
| #06           |                         | AAATGTGTG              | CTCTTGT                     | TTTCTATTTACAAGACACCAATCAA | AAACAAATAAAACATCATCACA | ATG                    |                        |                        |                        | 1         | rejected            |                |
| #07           |                         |                        | GGTTTCTATTTACAAGACACCAATCAA | AAACAAATAAAACATCATCACA    | ATG                    |                        |                        |                        |                        | 1         | accepted (-47)      |                |
| #08           |                         |                        |                             | TTTTGGACACCAATCAA         | AAACAAATAAAACATCATCACA | ATG                    |                        |                        |                        | 1         | accepted (-33)      |                |
| #09           |                         |                        |                             |                           | GACCAATCAA             | AAACAAATAAAACATCATCACA | ATG                    |                        |                        | 13        | accepted (-30)      |                |
| #10           |                         |                        |                             |                           |                        | TGACCAATCAA            | AAACAAATAAAACATCATCACA | ATG                    |                        | 3         | accepted (-30)      |                |
| #11           |                         |                        |                             |                           |                        | TTGACCAATCAA           | AAACAAATAAAACATCATCACA | ATG                    |                        | 1         | accepted (-30)      |                |
| #12           |                         |                        |                             |                           |                        |                        | TGGTGGACCAATCAA        | AAACAAATAAAACATCATCACA | ATG                    | 1         | rejected            |                |
| #13           |                         |                        |                             |                           |                        | TTACCCCTTAAGATTTG      | ACCAATCAA              | AAACAAATAAAACATCATCACA | ATG                    | 1         | rejected            |                |
| #14           |                         |                        |                             |                           |                        |                        | GTGACCAATCAA           | AAACAAATAAAACATCATCACA | ATG                    | 1         | rejected            |                |
| #15           |                         |                        |                             |                           |                        |                        |                        | GAATCAA                | AAACAAATAAAACATCATCACA | ATG       | 28                  | accepted (-27) |
| #16           |                         |                        |                             |                           |                        |                        |                        | TGAATCAA               | AAACAAATAAAACATCATCACA | ATG       | 2                   | accepted (-27) |
| #17           |                         |                        |                             |                           |                        |                        |                        | TTGAATCAA              | AAACAAATAAAACATCATCACA | ATG       | 3                   | accepted (-27) |
| #18           |                         |                        |                             |                           |                        |                        |                        | TGGAATCAA              | AAACAAATAAAACATCATCACA | ATG       | 1                   | accepted (-27) |
| #19           |                         |                        |                             |                           |                        |                        |                        | AAATGTGGAATCAA         | AAACAAATAAAACATCATCACA | ATG       | 1                   | rejected       |
| #20           |                         |                        |                             |                           |                        |                        |                        | AAATGTGGAATCAA         | AAACAAATAAAACATCATCACA | ATG       | 1                   | rejected       |
| #21           |                         |                        |                             |                           |                        |                        |                        | AAATGTGGAATCAA         | AAACAAATAAAACATCATCACA | ATG       | 1                   | rejected       |
| #22           |                         |                        |                             |                           |                        |                        |                        | ACAGAAATCAA            | AAACAAATAAAACATCATCACA | ATG       | 1                   | rejected       |
| #23           |                         |                        |                             |                           |                        |                        |                        | CGTGAATCAA             | AAACAAATAAAACATCATCACA | ATG       | 1                   | rejected       |
| #24           |                         |                        |                             |                           |                        |                        |                        | GTGAATCAA              | AAACAAATAAAACATCATCACA | ATG       | 1                   | rejected       |
| #24           |                         |                        |                             |                           |                        |                        |                        | TGGCGGACCNNATCAA       | AAACAAATAAAACATCATCACA | ATG       | 1                   | rejected       |
| #26           |                         |                        |                             |                           |                        |                        |                        |                        | GACAAATAAAACATCATCACA  | ATG       | 1                   | accepted (-20) |
| #27           |                         |                        |                             |                           |                        |                        |                        |                        | AAATAAAACATCATCACA     | ATG       | 1                   | rejected       |
| #28           |                         |                        |                             |                           |                        |                        |                        |                        | GATCATCACA             | ATG       | 2                   | accepted (-9)  |
| #29           |                         |                        |                             |                           |                        |                        |                        |                        | GATCACA                | ATG       | 3                   | accepted (-6)  |
| #30           |                         |                        |                             |                           |                        |                        |                        |                        | GGATCACA               | ATG       | 1                   | accepted (-6)  |
