# Supplementary material
Source: PubMed Central journal article supplement (PMC1693835)
Supplement: pnas_0605645103_4.pdf [file pnas_0605645103_4.pdf]

AAGAAAAC TAAAGAGCAAGTCTGATTTGGCACTACCACGCTTCCAACAGAAGTAATTGTTGCTTC  
AAATAAGTTTCGCAGCATGTGGATTCAAGTCCACAGATGCGATATTTAGGAGCCCAATCAGATAAT  
ATTGATTC CGGGTTATCTCTTGT TTTGTGTCGGCACAGGGGATTTAAATTGTGTAATGCTCAAGAC  
AAGTTATTGATGAGAACAAGAGATGGTATATAAACTGCTCTCTGAGGTATAGCTTTTGTGAGG  
**TAG**GCATACAAGATTTTCGGGA**ATGAGCACTATTAGTACCACAACGGCACCTGAGTTTATCAGAGT**  
**AAAGAGAAGAAGGGATGAGGATTTCTGTGCAGGCATTATGTATGTGTTGTTATTCTACCGATATAA**  
**CAAAAATGCGTTTGAC****TAA****CTAAGTTCATCTGGGACAATTCAGTAATTGATGAGGGGAAAAGAGT**  
**GAAGAAGCAGAAGTTCATATTTAAATTATCAAAGACTGTGAGCTCTGAAAGCTATCAATCCGAGC**  
**AAGAGTCTTCTACGCCACTCTTAAACTGGCTCATGAAGATCATCGACATTTTGTATTGGAACAA**  
**AGAAAAAAAAGTCGTAGAGACTCAGATGATGAAAAATCACAACAGCGGCTTGCAGCAGAAGGAAG**  
**TACTGTAGATGACGATGGGTTACCGCCAGAGATCAATCAA****ATGGTGAATGACTATTTAAAGTTGA**  
ATAAAGGTGTAGAAAAGACAGAAAGAAAAAACCAAGTAGGAAATATTTTACTGGGGATTCTGCA  
AAAATTGCATCACTACCCAGTTTAGATTACGTTTTTTGACATCTACCATTTGGAGAAAATTCATGA  
CGATGAGGTTGCTAGATATAACAACGAGAAAAATATAGGGTTTGTGAAAATTATTGAGCATATAG  
ATTTGGCTCTTGATGAAGAAAGTGATCCCAATGAAGCCCGTTCAGACGATGAGGATTCTAATGAC  
GAAAAC TATTACCAAATGATTATCCGGAGGATGAAGATGATGATAGATCTATTCTATTTGGTAG  
CGAAGGAGAGGATATAGCTGCATTGGGTGAAGAGATTGTTATAGGGGTTAATAAGAGCAGGTTTT  
CCTCTTGGAATGACGATAAAATTCAGGGATCTAATGGGTACCACGATGTGGAGGAAGAGTACGGG  
GATCTTTTTAACAGGCTTGGAGGAAAAAGTGATGTCTTGAAATCCATAAATTCCTCGAATTTTCAT  
TGACTTGGATGGCCAAGAAGGTGAAATAGAGATAAGTGATAACGAAGATGATTCTGATGAAGGAG  
ATGATATTGAATACCCTAGAAATGAATTTTTTCCGACGGATGTTGATGACCATTGGCGCATCAT  
AGGGACAGAATTTTTTCATCAGCTACAGAAAAAAATTAATAGAAGCTAA
