# Supplementary material
Source: PubMed Central journal article supplement (PMC1693835)

chr02 489530 to 492530

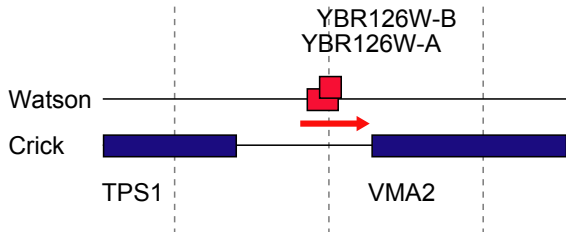

chr03 161354 to 164354

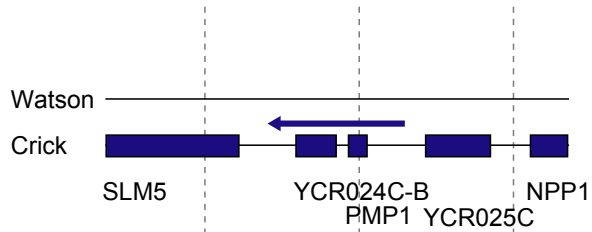

chr04 719673 to 722673

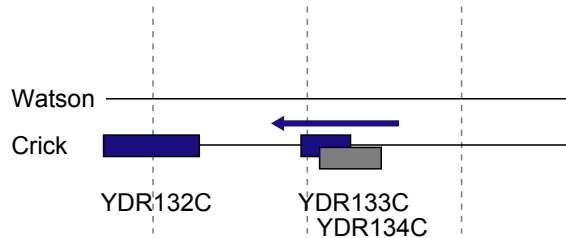

chr11 391206 to 394206

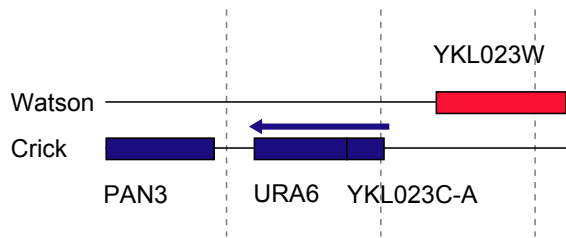

Supplement: pnas_0605645103_2.pdf [file pnas_0605645103_2.pdf]
